# Supplementary material for: Synthesis, characterization, and crystal structure of RNA targeted l- and d-phenylalanine-(1,10-phen)–copper(ii) conjugate complexes: comparative in vitro RNA binding profile of enantiomers and their biological evaluation by morphological studies and antibacterial activity
Source: Royal Society of Chemistry journal article supplement (doi:10.1039/c6ra14503e), 2016-01-01
Supplement: c6ra14503e1.pdf [file c6ra14503e1.pdf]

## Synthesis, characterization, crystal structure of RNA targeted L- and D-phenylalanine-(1, 10-phen)-copper(II) conjugate complexes; Comparative *in vitro* RNA binding profile of enantiomers and their biological evaluation by morphological studies and antibacterial activity

Surbhi Sharma,<sup>a</sup> Loic Toupet<sup>b</sup>, Musheer Ahmad<sup>c</sup> and Farukh Arjmand<sup>a,\*</sup>

<sup>a</sup>Department of Chemistry, Aligarh Muslim University, Aligarh 202002, India.

<sup>b</sup>Institut de Physique de Rennes, UMR 625, Université de Rennes 1, Campus de Beaulieu Bat. 11 A, 263 av. Général Leclerc, 35042 Rennes Cedex, France.

<sup>c</sup>Department of Applied Chemistry, Aligarh Muslim University, Aligarh 202002, India.

\*E-mail: farukh\_arjmand@yahoo.co.in. \*Corresponding author. Tel.: +91 5712703893

**Table S1.** Selected bond lengths for complex **1a**, C<sub>21</sub>H<sub>22</sub>CuN<sub>4</sub>O<sub>7</sub>

| Bond lengths | (Å)      |
|--------------|----------|
| Cu(1)-O(2)   | 1.941(2) |
| Cu(1)-N(3)   | 1.993(3) |
| Cu(1)-N(2)   | 2.004(3) |
| Cu(1)-N(1)   | 2.029(3) |
| Cu(1)-O(1)   | 2.199(3) |
| O(2)-C(13)   | 1.281(4) |
| O(3)-C(13)   | 1.232(4) |
| O(4)-N(4)    | 1.240(5) |
| O(5)-N(4)    | 1.227(5) |
| O(6)-N(4)    | 1.230(5) |
| N(1)-C(1)    | 1.326(4) |
| N(1)-C(12)   | 1.354(4) |
| N(2)-C(10)   | 1.323(5) |
| N(2)-C(11)   | 1.358(4) |
| N(3)-C(14)   | 1.490(4) |

**Table S2.** Selected bond angles for complex **1a**, C<sub>21</sub>H<sub>22</sub>CuN<sub>4</sub>O<sub>7</sub>

| Bond Angle       | [deg]      |
|------------------|------------|
| O(2)-Cu(1)-N(3)  | 84.59(10)  |
| O(2)-Cu(1)-N(2)  | 92.24(10)  |
| N(3)-Cu(1)-N(2)  | 168.26(11) |
| O(2)-Cu(1)-N(1)  | 163.45(10) |
| N(3)-Cu(1)-N(1)  | 97.49(11)  |
| N(2)-Cu(1)-N(1)  | 82.41(11)  |
| O(2)-Cu(1)-O(1)  | 105.60(11) |
| N(3)-Cu(1)-O(1)  | 98.61(11)  |
| N(2)-Cu(1)-O(1)  | 93.13(11)  |
| N(1)-Cu(1)-O(1)  | 90.37(11)  |
| C(13)-O(2)-Cu(1) | 116.3(2)   |
| C(1)-N(1)-C(12)  | 118.3(3)   |

|                  |            |
|------------------|------------|
| C(1)-N(1)-Cu(1)  | 130.2(2)   |
| C(12)-N(1)-Cu(1) | 111.3(2)   |
| C(10)-N(2)-Cu(1) | 128.7(2)   |
| C(11)-N(2)-Cu(1) | 112.4(2)   |
| C(14)-N(3)-Cu(1) | 110.41(19) |

**Table S3.** Selected bond lengths for complex **1b**, C<sub>21</sub>H<sub>22</sub>CuN<sub>4</sub>O<sub>7</sub>

| <b>Bond lengths</b> | <b>(Å)</b> |
|---------------------|------------|
| Cu(1)-O(1)          | 1.941(2)   |
| Cu(1)-N(1)          | 1.985(3)   |
| Cu(1)-N(2)          | 2.024(3)   |
| Cu(1)-N(3)          | 2.001(3)   |
| Cu(1)-O(3)          | 2.191(3)   |
| O(1)-C(1)           | 1.283(4)   |
| O(2)-C(1)           | 1.230(4)   |
| O(4)-N(4)           | 1.245(4)   |
| O(5)-N(4)           | 1.234(5)   |
| O(6)-N(4)           | 1.243(5)   |
| N(2)-C(10)          | 1.327(4)   |
| N(3)-C(20)          | 1.360(4)   |
| N(1)-C(2)           | 1.484(4)   |

**Table S4.** Selected bond angles for complex **1b**, C<sub>21</sub>H<sub>22</sub>CuN<sub>4</sub>O<sub>7</sub>

| <b>Bond Angle</b> | <b>[deg]</b> |
|-------------------|--------------|
| O(1)-Cu(1)-N(1)   | 84.56(10)    |
| O(3)-Cu(1)-N(3)   | 92.71(11)    |
| N(1)-Cu(1)-N(3)   | 168.23(11)   |
| O(1)-Cu(1)-N(2)   | 163.64(9)    |
| N(1)-Cu(1)-N(2)   | 97.45(11)    |
| N(3)-Cu(1)-N(2)   | 82.51(11)    |
| O(1)-Cu(1)-O(3)   | 105.96(11)   |
| N(1)-Cu(1)-O(3)   | 99.06(12)    |
| N(2)-Cu(1)-O(3)   | 89.81(11)    |
| N(3)-Cu(1)-O(3)   | 92.71(11)    |
| C(1)-O(1)-Cu(1)   | 116.09(19)   |

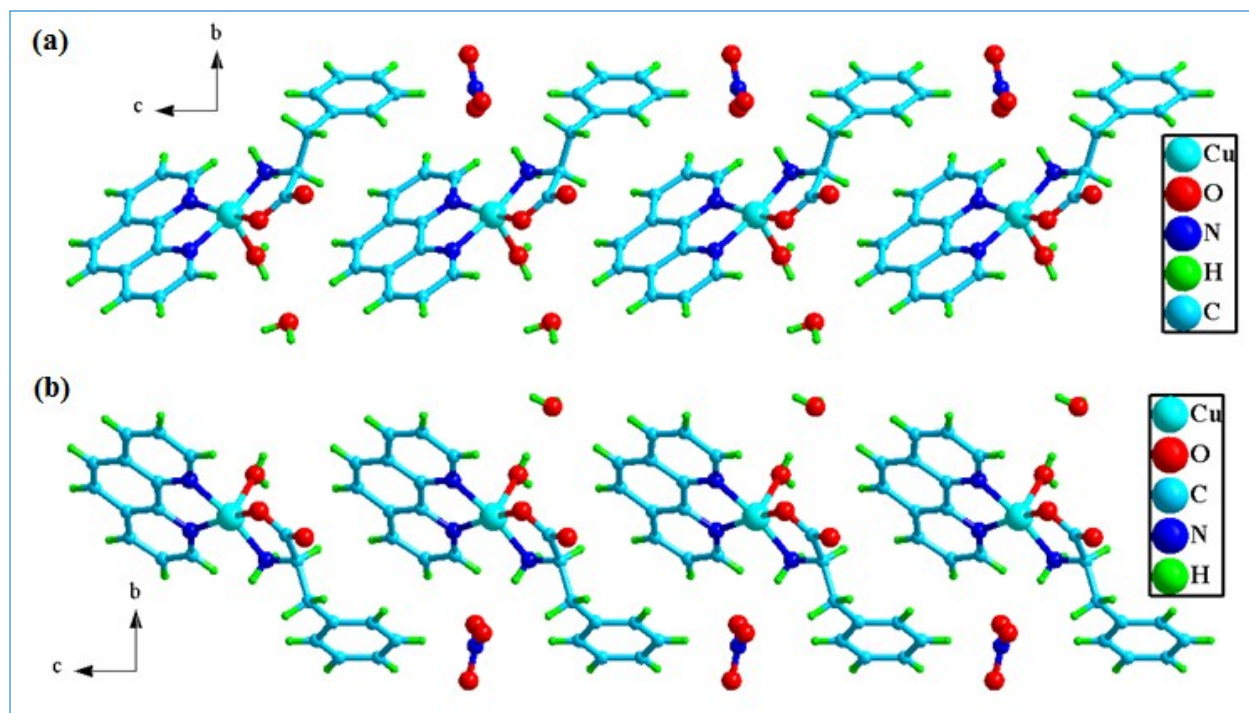

**Fig. S1** Packing diagram of (a) complex 1a and (b) complex b.

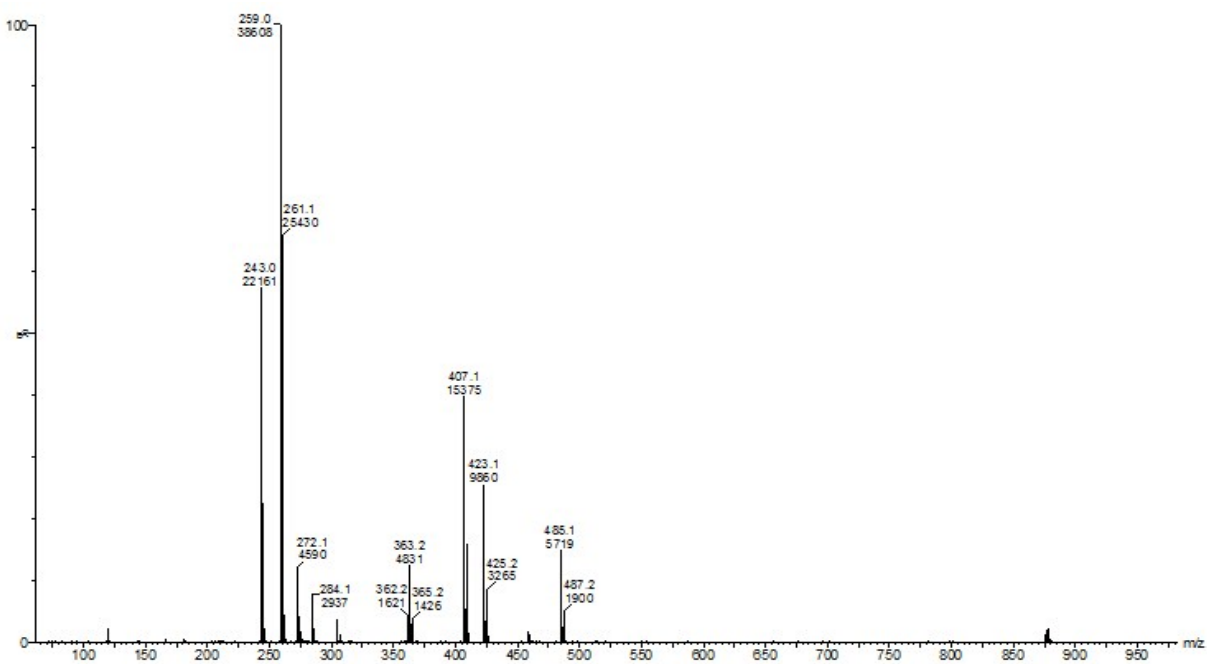

**Fig. S2** ESI-MS spectrum of complex 1a

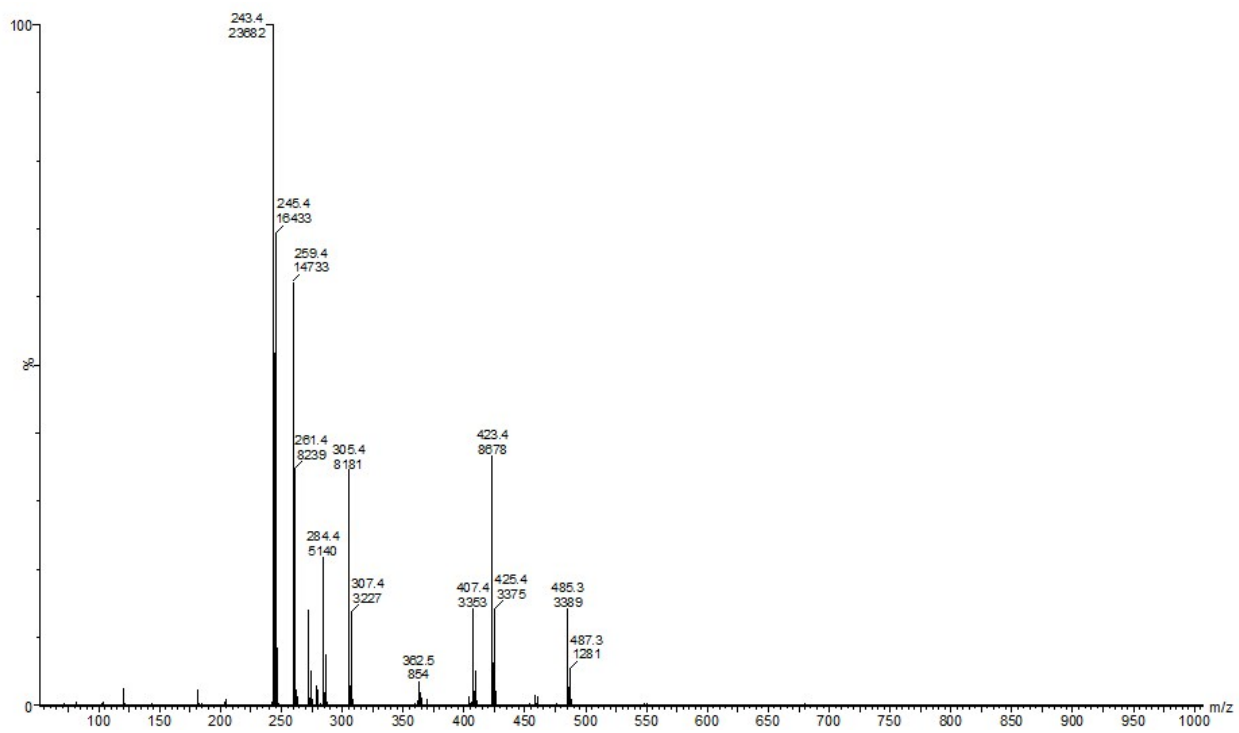

**Fig. S3** ESI-MS spectrum of complex **b**

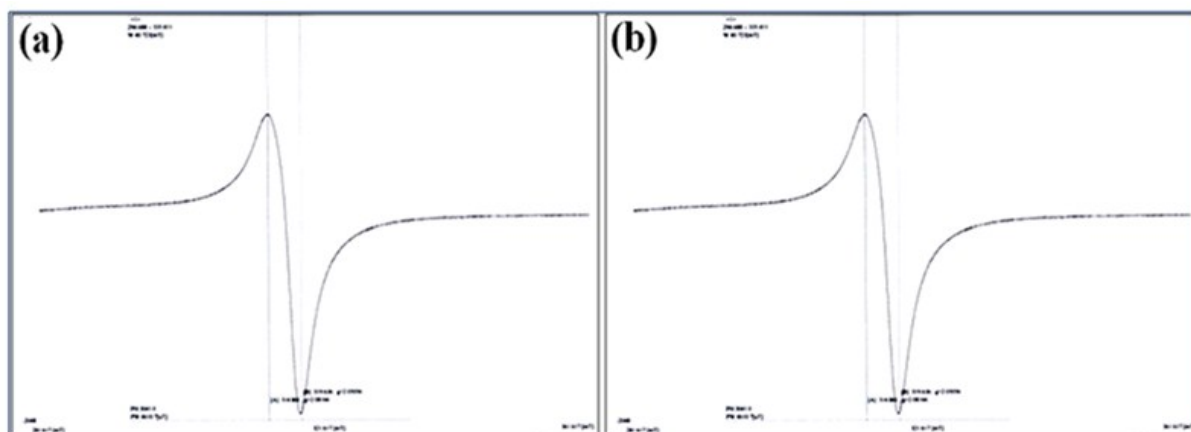

**Fig. S4** X-band EPR spectrum of complex (a) **1a** and (b) **b** at RT.

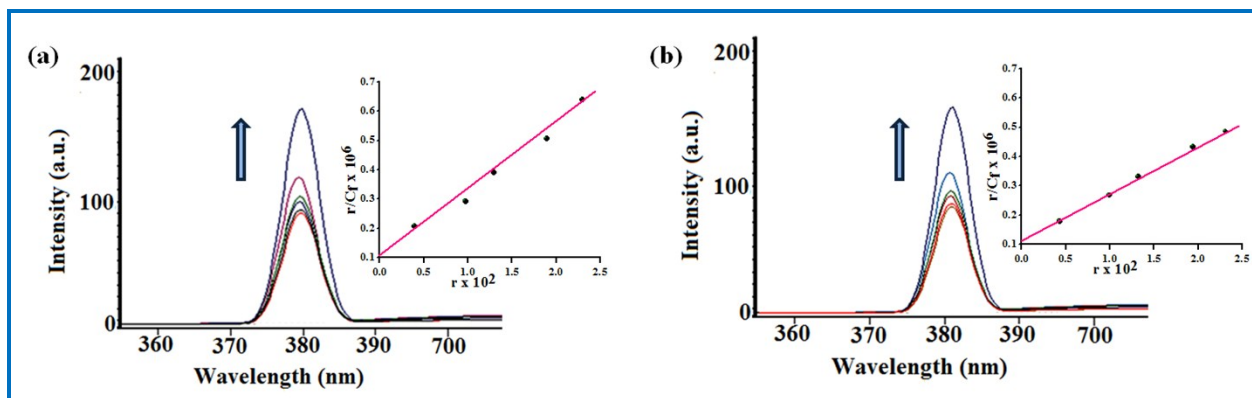

**Fig. S5** Emission spectra of complex **1a** and **b** in Tris–HCl buffer at pH 7.2 upon addition of yeast tRNA. [RNA] = 0.00–4.00 × 10<sup>−5</sup> M, [Complex] = 1.67 × 10<sup>−4</sup> M. Arrows show change in intensity with increasing concentration of RNA.

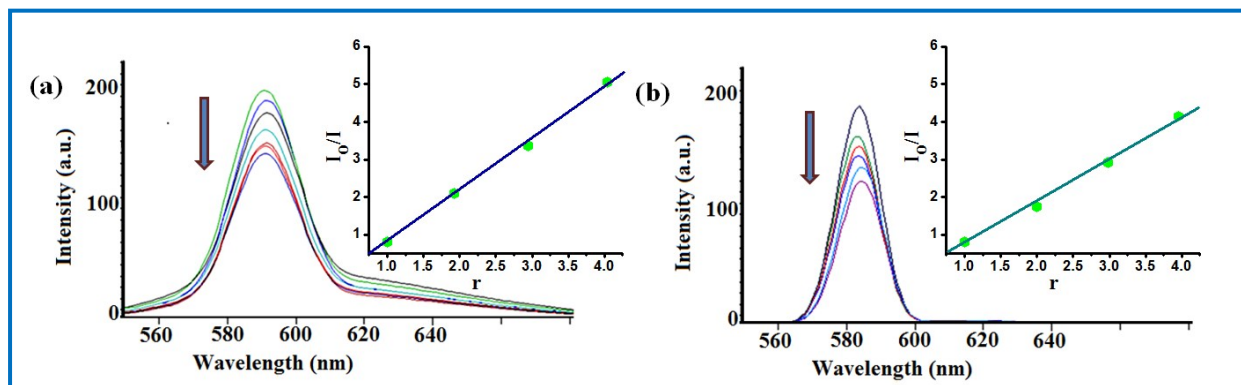

**Fig. S6** Emission spectra of EB–yeast tRNA in the absence and presence of complex **1a** and **b** in Tris–HCl buffer at pH 7.2. [Complex] = [EB] = [RNA] = 1.11 × 10<sup>−4</sup> M. Arrow shows change in intensity with increasing concentration of complex **1a** and **b**.

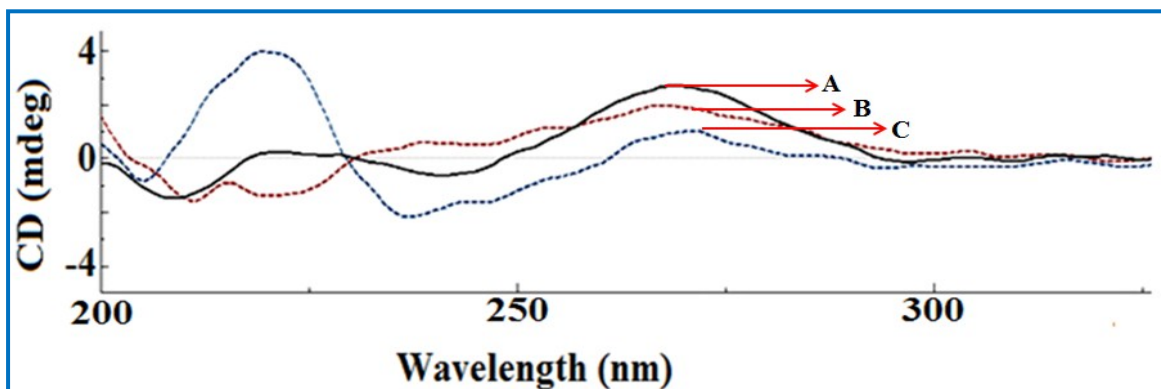

**Fig. S7** CD spectra of (A) t-RNA alone, (B) t-RNA in presence of complex **1a**, (C) t-RNA in presence of complex **b** in Tris-HCl buffer at 25 °C. [Complex] =  $1 \times 10^{-4}$  M and [t-RNA] =  $1 \times 10^{-4}$  M.

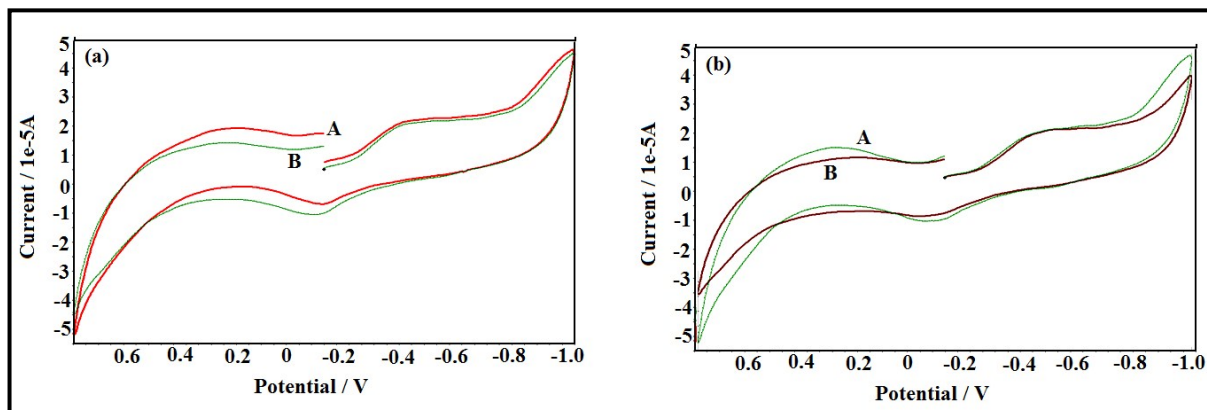

**Fig. S8** (a) Cyclic voltammogram (5:95 DMSO/H<sub>2</sub>O, 25 °C) of (A) unbound complex **1a** and (B) complex **1a** in presence of t-RNA. (b) Cyclic voltammogram (5:95 DMSO/H<sub>2</sub>O, 25 °C) of (A) unbound complex **1b** and (B) complex **1b** in presence of t-RNA at a scan rate of 0.2 V s<sup>-1</sup>. [Complex] =  $1 \times 10^{-3}$  and [t-RNA] =  $4 \times 10^{-3}$ .
